# Supplementary material for: MicroRNA 148a Suppresses Tuberculous Fibrosis by Targeting NOX4 and POLDIP2
Source: MDPI journal article supplement (doi:10.3390/ijms23062999), 2022-03-10
Supplement: s1 [file s1]

**Supplementary Table S1.** The predicted sequence alignment between mouse miRNAs and NOX4 3'UTR.

| ID       |                | Alignment                                   | Position | site      |
|----------|----------------|---------------------------------------------|----------|-----------|
| miR-9    | Target (5'-3') | 5' ....AACAGCUGUGCUAUG <b>CCAAAGA</b>       | 3' UTR   | 90-96     |
|          | miRNA(3'-5')   | 3' GUAUGUCGAUCUAU..... <b>GGUUUCU</b>       |          |           |
| miR-196b | Target (5'-3') | 5' AGCUUAUCCUUA <b>ACCAAAGA</b>             | 3' UTR   | 761-768   |
|          | miRNA(3'-5')   | 3' AGUAUGUCGAUCUAU <b>UGGUUUCU</b>          |          |           |
| miR-148a | Target (5'-3') | 5' UCAGAAGGAAAAUUU <b>ACUACCUU</b>          | 3' UTR   | 1048-1054 |
|          | miRNA(3'-5')   | 3' GGGUUGUUGUCCUU <b>UGAUGGAU</b>           |          |           |
| miR-215  | Target (5'-3') | 5' CACUAAUAUUAUUUU <b>UGCACUGU</b>          | 3' UTR   | 941-947   |
|          | miRNA(3'-5')   | 3' UGUUUCAAGACAUC <b>ACGUGACU</b>           |          |           |
| miR-203  | Target (5'-3') | 5' ACAUU <b>UCAAAA</b> AUUC <b>AGGUCAAA</b> | 3' UTR   | 1565-1571 |
|          | miRNA(3'-5')   | 3' CAGAC <b>AGUUU</b> AGUA - <b>UCCAGUA</b> |          |           |
| miR-203  | Target (5'-3') |                                             | CDS      | -         |
|          | miRNA(3'-5')   |                                             |          |           |

**Supplementary Table S2.** The baseline characteristics of patients with transudate and tuberculous pleural effusion

| Group      | Subject | Age | Sex | Sputum AFB culture | PE AFB culture | PE ADA | PE/Serum protein | PE/Serum albumin |
|------------|---------|-----|-----|--------------------|----------------|--------|------------------|------------------|
| TB-PE      | TB-PE 1 | 75  | M   | Negative           | Positive       | 6.2    | 1                | 0.74             |
|            | TB-PE 2 | 21  | M   | Negative           | Positive       | 6.7    | 0.61             | 0.67             |
|            | TB-PE 3 | 92  | F   | Positive           | Negative       | 30     | 0.78             | 0.75             |
| Transudate | T1      | 84  | M   | Negative           | Negative       | 36.9   | 0.41             | 0.36             |
|            | T2      | 80  | F   | Negative           | Negative       | <4.0   | 0.26             | 0.21             |
|            | T3      | 92  | F   | Negative           | Negative       | 7      | 0.39             | 0.44             |

PE, pleural effusion; AFB, acid-fast bacilli; ADA, adenosine deaminase; TB-PE, tuberculous pleural effusion; LDH, lactate dehydrogenase; CRP, C-reactive protein
