# Supplementary material for: MicroRNA 148a Suppresses Tuberculous Fibrosis by Targeting NOX4 and POLDIP2
Source: MDPI journal article supplement (doi:10.3390/ijms23062999), 2022-03-10
Supplement: s1 [file s1]

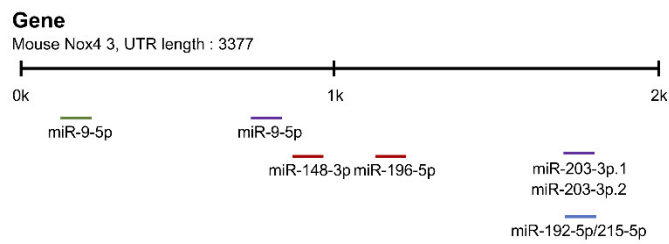

**Supplementary Figure S1.** Prediction of potential miRNAs that binds to 3' UTR of mouse NOX4 gene.

A target scan was used to search for miRNAs that could interact with the 3' UTR of the mouse NOX4 gene. miR-9-5p, miR-148-3p, miR-196-5p, miR-203-3p, and miR-192-5p/215-5p were identified.

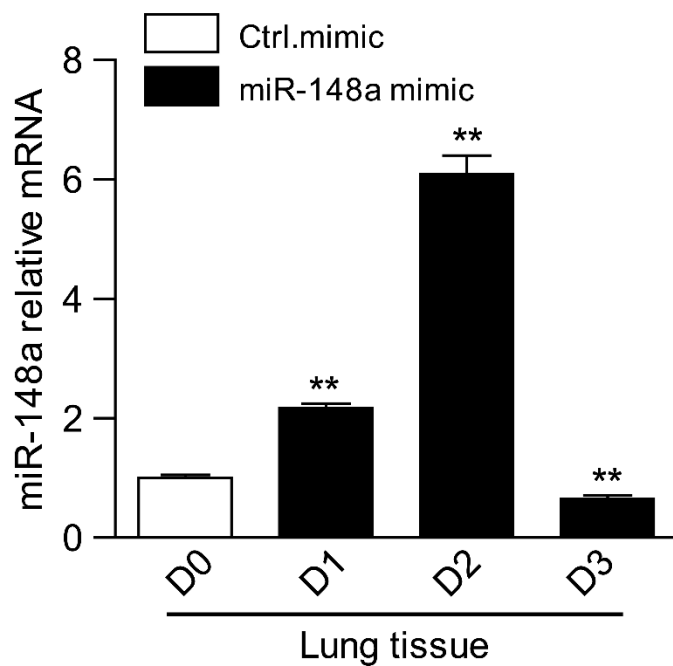

**Supplementary Figure S2.** miR-148a levels in mouse lung peaked on the second day from intravenous injection with miR-148a mimic (20 nmol/kg)
